# Supplementary material for: A genetic engineering strategy for editing near-infrared-II fluorophores
Source: PubMed Central journal article supplement (PMC9127093; doi:10.1038/s41467-022-30304-9), 2022-05-23
Supplement: 41467_2022_30304_MOESM3_ESM.pdf [file 41467_2022_30304_MOESM3_ESM.pdf]

**Title:** Supplementary Movie 1:

**Description:** Real-time NIR-II imaging of vessels using IR783@TDIII.

**Title:** Supplementary Movie 2:

**Description:** Real-time high-magnification (2.5×) NIR-II imaging was performed in mice with shaved heads.

**Title:** Supplementary Movie 3:

**Description:** Real-time high-resolution imaging and detection of congenital lymphedema
